# Supplementary material for: Identification of molecular subtypes and a six-gene risk model related to cuproptosis for triple negative breast cancer
Source: Front Genet. 2022 Oct 28;13:1022236. doi: 10.3389/fgene.2022.1022236 (PMC9649643; doi:10.3389/fgene.2022.1022236)
Supplement: Supplementary file 8 [file Table4.XLSX]

## Sheet: Table S2
Table S2. A list of 1275 DEGs significantly correlated with cuproptosis metabolism
gene	cor	p
HJURP	-0.5225	0
UBE2C	-0.542893	0
TPX2	-0.479533	6.17284e-14
TROAP	-0.539892	0
NEK2	-0.481658	4.61853e-14
AURKA	-0.47441	1.23679e-13
KIF4A	-0.483995	3.33067e-14
PLK1	-0.512294	4.44089e-16
CENPA	-0.49208	1.06581e-14
NUF2	-0.476776	8.9706e-14
CDCA3	-0.522018	0
AURKB	-0.549017	0
CDC20	-0.556355	0
PTTG1	-0.541741	0
CEP55	-0.481924	4.44089e-14
MELK	-0.460602	7.57616e-13
UBE2T	-0.491506	1.15463e-14
SKA1	-0.44484	5.44476e-12
PKMYT1	-0.546747	0
KIFC1	-0.57255	0
SPC24	-0.540444	0
KIF2C	-0.522508	0
MYBL2	-0.525017	0
CDCA8	-0.507345	1.11022e-15
GTSE1	-0.514797	4.44089e-16
CCNB2	-0.509568	8.88178e-16
KIF18B	-0.517547	2.22045e-16
KIF20A	-0.506015	1.33227e-15
SKA3	-0.458096	1.04361e-12
FAM83D	-0.465052	4.26104e-13
CDKN3	-0.481966	4.44089e-14
NDC80	-0.474271	1.26121e-13
BUB1	-0.471443	1.83853e-13
DLGAP5	-0.46679	3.39728e-13
CDK1	-0.437723	1.28391e-11
ANLN	-0.447905	3.73968e-12
BIRC5	-0.52904	0
IQGAP3	-0.507896	1.11022e-15
CDC45	-0.543879	0
FOXM1	-0.50095	3.10862e-15
CDCA5	-0.521638	0
EXO1	-0.462172	6.1906e-13
CCNA2	-0.477011	8.70415e-14
CKAP2L	-0.462033	6.30163e-13
SGO1	-0.442172	7.52731e-12
NCAPG	-0.462034	6.30163e-13
ASPM	-0.429223	3.48575e-11
ORC6	-0.506496	1.33227e-15
MTFR2	-0.419834	1.01758e-10
CENPF	-0.490153	1.42109e-14
CCNB1	-0.512985	4.44089e-16
NCAPH	-0.508128	8.88178e-16
RRM2	-0.496275	5.77316e-15
TTK	-0.446549	4.4178e-12
TACC3	-0.590789	0
ASF1B	-0.553559	0
SPC25	-0.491826	1.11022e-14
CDC25C	-0.471565	1.80744e-13
KIF14	-0.413551	2.04652e-10
BUB1B	-0.480336	5.55112e-14
NUSAP1	-0.508178	8.88178e-16
MCM10	-0.429055	3.55409e-11
PIMREG	-0.541236	0
PBK	-0.430702	2.93539e-11
PRR11	-0.469846	2.27152e-13
RAD51	-0.469757	2.29816e-13
DEPDC1	-0.407592	3.91807e-10
PCLAF	-0.512615	4.44089e-16
SPAG5	-0.506242	1.33227e-15
UBE2S	-0.582119	0
HMGB3	-0.516747	4.44089e-16
PRC1	-0.533996	0
OIP5	-0.446012	4.718e-12
NEIL3	-0.420743	9.18676e-11
HMMR	-0.433209	2.18976e-11
MKI67	-0.495047	7.10543e-15
SHCBP1	-0.493632	8.65974e-15
EZH2	-0.514511	4.44089e-16
CDCA2	-0.439774	1.00471e-11
CENPM	-0.627225	0
CKS2	-0.525751	0
CCNE1	-0.41349	2.06033e-10
RAD54L	-0.497592	4.88498e-15
KIF23	-0.498333	4.44089e-15
E2F1	-0.541892	0
TRIP13	-0.484334	3.19744e-14
UHRF1	-0.537997	0
CENPE	-0.413877	1.97445e-10
TK1	-0.604914	0
KIF15	-0.43989	9.90874e-12
AUNIP	-0.423732	6.54847e-11
GINS1	-0.456618	1.25921e-12
TOP2A	-0.494557	7.54952e-15
DEPDC1B	-0.44632	4.5437e-12
CDC25A	-0.450546	2.6974e-12
KPNA2	-0.504654	1.77636e-15
CCDC167	-0.599562	0
RECQL4	-0.600233	0
E2F8	-0.420971	8.95315e-11
ECE2	-0.466003	3.76588e-13
DTL	-0.485329	2.77556e-14
KIF11	-0.483514	3.57492e-14
MND1	-0.459653	8.55538e-13
ARHGAP11A	-0.424053	6.31384e-11
KIF18A	-0.443487	6.41887e-12
STMN1	-0.528984	0
CBX2	-0.449537	3.05711e-12
KNL1	-0.406868	4.23567e-10
CDC6	-0.483997	3.33067e-14
JPT1	-0.586143	0
TEDC2	-0.568982	0
COL10A1	-0.417106	1.38074e-10
ESPL1	-0.494771	7.32747e-15
PAQR4	-0.555049	0
CDT1	-0.593421	0
E2F2	-0.497117	5.32907e-15
BLM	-0.492824	9.76996e-15
WDR62	-0.429227	3.4839e-11
H2AFZ	-0.49182	1.11022e-14
H2AFX	-0.588081	0
POC1A	-0.505015	1.77636e-15
RAD51AP1	-0.461988	6.33715e-13
PPP1R14B	-0.559415	0
POLQ	-0.433775	2.04892e-11
SLC7A5	-0.520807	0
CENPW	-0.508284	8.88178e-16
LMNB1	-0.564287	0
MMP11	-0.472249	1.65201e-13
ORC1	-0.488476	1.77636e-14
MAD2L1	-0.440099	9.66249e-12
GPRIN1	-0.480895	5.12923e-14
TICRR	-0.50538	1.55431e-15
DDX39A	-0.57285	0
ALG3	-0.467733	3.00204e-13
RMI2	-0.524114	0
ARHGEF39	-0.482668	4.01901e-14
CHEK1	-0.440143	9.61187e-12
ZWINT	-0.520953	0
STIL	-0.432234	2.45479e-11
SLC52A2	-0.532671	0
SH2D2A	-0.579661	0
PIF1	-0.540122	0
RACGAP1	-0.415465	1.65675e-10
EME1	-0.513141	4.44089e-16
HASPIN	-0.433488	2.11902e-11
TONSL	-0.583018	0
RNASEH2A	-0.590771	0
CENPU	-0.469114	2.50022e-13
SCNM1	-0.517285	2.22045e-16
MFAP2	-0.49876	3.9968e-15
HMGA1	-0.521768	0
FANCA	-0.483992	3.33067e-14
MMP1	-0.47847	7.14984e-14
PSRC1	-0.54191	0
HDGF	-0.535078	0
PSMB4	-0.460489	7.68718e-13
CIT	-0.503752	1.9984e-15
FEN1	-0.526917	0
CTPS1	-0.494242	7.99361e-15
CLSPN	-0.412587	2.27507e-10
TUBA1C	-0.480725	5.24025e-14
PITX1	-0.455554	1.44063e-12
DONSON	-0.441669	7.99893e-12
MRPL14	-0.549227	0
LAGE3	-0.46909	2.5091e-13
CIP2A	-0.427698	4.15761e-11
FLAD1	-0.430133	3.13642e-11
FAM111B	-0.457274	1.15863e-12
SNRPG	-0.4203	9.65603e-11
SNRPC	-0.504851	1.77636e-15
TRIM59	-0.466458	3.54827e-13
NME1	-0.565513	0
CALR	-0.554059	0
BOP1	-0.564675	0
PFDN2	-0.469065	2.51799e-13
COL11A1	-0.412175	2.38026e-10
CENPO	-0.490215	1.39888e-14
LRP8	-0.429116	3.52931e-11
PLAUR	-0.534415	0
TYMS	-0.517075	2.22045e-16
PRDX4	-0.450858	2.59481e-12
MCM4	-0.464569	4.53859e-13
PLPP4	-0.416006	1.56024e-10
LSM4	-0.505263	1.55431e-15
SAMD1	-0.551814	0
INHBA	-0.411661	2.51807e-10
HSD17B6	-0.420208	9.7566e-11
PCNA	-0.510214	8.88178e-16
C8orf76	-0.423577	6.66529e-11
FANCI	-0.516643	4.44089e-16
XRCC2	-0.432668	2.33307e-11
PARPBP	-0.403498	6.07618e-10
JTB	-0.474237	1.26565e-13
PLK4	-0.401623	7.41408e-10
RELT	-0.586333	0
IL4I1	-0.565076	0
CDC7	-0.472286	1.64313e-13
CXCL10	-0.426743	4.64055e-11
DNAJB11	-0.568236	0
ARF1	-0.509814	8.88178e-16
BCL2L12	-0.556233	0
HGH1	-0.478219	7.39409e-14
COA6	-0.414002	1.94741e-10
LMNB2	-0.624638	0
FOXP3	-0.545982	0
SEM1	-0.442597	7.1505e-12
RANBP1	-0.532285	0
TUBB	-0.493079	9.32587e-15
CCT3	-0.507024	1.33227e-15
PFN1	-0.622398	0
ABRACL	-0.462047	6.29052e-13
DDIAS	-0.401689	7.3622e-10
MCM2	-0.546699	0
PYCR1	-0.571441	0
POP7	-0.511474	6.66134e-16
RTKN2	-0.40766	3.88927e-10
PFDN6	-0.575712	0
SAPCD2	-0.539811	0
CNIH2	-0.501042	3.10862e-15
CDCA7	-0.516845	2.22045e-16
TOMM40	-0.549248	0
CLEC5A	-0.404812	5.28124e-10
TUBB3	-0.42458	5.94551e-11
CTHRC1	-0.459194	9.07274e-13
GJB2	-0.430035	3.17217e-11
GPR19	-0.448013	3.69038e-12
VPS72	-0.497355	4.88498e-15
TMEM132A	-0.628493	0
TSTA3	-0.51273	4.44089e-16
ESM1	-0.415025	1.73936e-10
ADM2	-0.54421	0
RFC4	-0.487677	1.9984e-14
MRGBP	-0.583911	0
REEP4	-0.493848	8.43769e-15
ALYREF	-0.597612	0
FBXL6	-0.555193	0
BAK1	-0.548152	0
TNFRSF9	-0.462334	6.06182e-13
TDO2	-0.421274	8.65217e-11
RCOR2	-0.442905	6.88827e-12
SLC16A3	-0.566359	0
ILF2	-0.477375	8.28226e-14
LIMD2	-0.70088	0
CCN4	-0.428352	3.85552e-11
TLCD1	-0.477641	7.99361e-14
SLC25A19	-0.459466	8.76188e-13
RFC2	-0.471471	1.82965e-13
PNP	-0.440482	9.22817e-12
SLC50A1	-0.418981	1.11977e-10
HOMER3	-0.581664	0
TTYH3	-0.588582	0
RCC2	-0.573697	0
OTX1	-0.421253	8.67331e-11
CDCA4	-0.572227	0
SAC3D1	-0.497324	5.10703e-15
PRAME	-0.420814	9.11342e-11
PRR19	-0.518116	2.22045e-16
ATP6V0B	-0.560164	0
GINS4	-0.432588	2.35525e-11
COLGALT1	-0.461927	6.38822e-13
CDC25B	-0.507486	1.11022e-15
HAUS8	-0.585232	0
E2F7	-0.430964	2.84717e-11
TPI1	-0.406071	4.61488e-10
ADAM19	-0.533754	0
SNRPD1	-0.50077	3.10862e-15
MEX3A	-0.534503	0
SLC35A2	-0.46343	5.26024e-13
CFL1	-0.613468	0
RHBDF2	-0.641356	0
TMSB10	-0.564058	0
RPL39L	-0.536351	0
CD3EAP	-0.451133	2.50777e-12
SNRPA1	-0.497341	5.10703e-15
GINS2	-0.55167	0
KCTD5	-0.529031	0
MTHFD2	-0.424064	6.30553e-11
IBSP	-0.407182	4.09508e-10
SNRPB	-0.614913	0
GAPDH	-0.468952	2.55573e-13
CHAF1B	-0.52395	0
PRCC	-0.565109	0
B4GALT3	-0.482077	4.35207e-14
NAXE	-0.468169	2.83329e-13
RABIF	-0.414919	1.75981e-10
E2F3	-0.429934	3.2097e-11
PAFAH1B3	-0.64784	0
BRIP1	-0.431762	2.59397e-11
MIS18A	-0.490036	1.42109e-14
SF3B4	-0.520707	0
HPDL	-0.40938	3.22862e-10
CABLES2	-0.50327	2.22045e-15
ADAM8	-0.588366	0
TEAD4	-0.478405	7.19425e-14
SAP30	-0.476712	9.05942e-14
CENPK	-0.460063	8.11795e-13
ACOT7	-0.561842	0
HES6	-0.496507	5.77316e-15
RIPK2	-0.409773	3.09359e-10
MTHFD1L	-0.446766	4.30167e-12
HMGB2	-0.474804	1.1724e-13
MANF	-0.593065	0
MRPS12	-0.483743	3.4639e-14
SQLE	-0.44167	7.99782e-12
HPRT1	-0.470926	1.96732e-13
PPM1G	-0.55494	0
NOP2	-0.51026	8.88178e-16
CHEK2	-0.524458	0
C21orf58	-0.567857	0
YIF1B	-0.518396	2.22045e-16
IL21R	-0.505192	1.55431e-15
CHAC1	-0.414795	1.78411e-10
MRPL9	-0.467091	3.26406e-13
POP1	-0.447582	3.89155e-12
SLC12A8	-0.509951	8.88178e-16
BGN	-0.508735	8.88178e-16
EIF5A	-0.501986	2.66454e-15
PDIA4	-0.535164	0
S100A11	-0.434843	1.80651e-11
P2RY6	-0.477195	8.4821e-14
STIP1	-0.479548	6.17284e-14
CDK2AP1	-0.452612	2.085e-12
HOXC13	-0.443991	6.03784e-12
ADAMTS14	-0.485836	2.57572e-14
EXOSC4	-0.579164	0
BYSL	-0.507675	1.11022e-15
MCM6	-0.428062	3.98641e-11
HNRNPAB	-0.535929	0
BAX	-0.653693	0
RCC1	-0.572361	0
DTYMK	-0.592639	0
KREMEN2	-0.414007	1.94616e-10
POLE2	-0.404285	5.58728e-10
PRIM2	-0.424294	6.1422e-11
SERPINH1	-0.497881	4.66294e-15
SHMT2	-0.524597	0
LAMP3	-0.4659	3.81473e-13
PRR7	-0.576549	0
LSR	-0.582083	0
ADAMDEC1	-0.441027	8.64331e-12
PPP4C	-0.547253	0
CTXN1	-0.602609	0
PSMG3	-0.57156	0
SPINDOC	-0.623001	0
SLC39A4	-0.462962	5.58886e-13
SH3BP1	-0.716869	0
MMP13	-0.42582	5.15901e-11
RPN1	-0.486299	2.44249e-14
ATAD3A	-0.575189	0
LSM2	-0.525402	0
NMU	-0.407642	3.89662e-10
DSN1	-0.434319	1.92177e-11
LIMK1	-0.579905	0
TIMELESS	-0.46878	2.61569e-13
AP1S1	-0.470954	1.96065e-13
TOR3A	-0.490283	1.37668e-14
HIST1H2AM	-0.42427	6.15905e-11
POLR2H	-0.539742	0
SLAMF8	-0.54193	0
GPR84	-0.478475	7.14984e-14
HELLS	-0.528692	0
NFKBIE	-0.625778	0
LRRC59	-0.49014	1.42109e-14
KIF22	-0.581306	0
PUSL1	-0.535791	0
CCNQ	-0.501357	2.66454e-15
TCF19	-0.533564	0
MAGOH	-0.495442	6.66134e-15
ETV7	-0.504056	1.77636e-15
UQCC2	-0.535617	0
PSMC4	-0.46287	5.6577e-13
NACC1	-0.565109	0
CDK5	-0.473877	1.32783e-13
YARS	-0.452468	2.12297e-12
ARPC5L	-0.466853	3.36842e-13
IDH2	-0.406659	4.33235e-10
NUDT1	-0.558266	0
MAD2L2	-0.579611	0
SEMA7A	-0.673325	0
LAPTM4B	-0.406433	4.43891e-10
EBP	-0.427857	4.08225e-11
TRAIP	-0.517673	2.22045e-16
CDKN2A	-0.406828	4.25402e-10
SCT	-0.512946	4.44089e-16
LRWD1	-0.55831	0
TRIM11	-0.605559	0
CHAF1A	-0.52797	0
INCENP	-0.456153	1.3356e-12
CDKN2D	-0.488671	1.73195e-14
CHRNA5	-0.425784	5.18088e-11
SLC19A1	-0.401174	7.77407e-10
ISG15	-0.514013	4.44089e-16
APOBEC3B	-0.448436	3.50253e-12
HIST1H2BK	-0.425869	5.13012e-11
PLOD1	-0.4704	2.10942e-13
YDJC	-0.602557	0
RUVBL1	-0.523721	0
RHEBL1	-0.530974	0
RGS19	-0.669462	0
SLC25A39	-0.483118	3.77476e-14
GEN1	-0.41854	1.17647e-10
SNRPE	-0.410667	2.80683e-10
MCM7	-0.49302	9.32587e-15
SLC6A9	-0.495523	6.66134e-15
FANCD2	-0.485577	2.68674e-14
SLC2A6	-0.461603	6.66134e-13
ADRM1	-0.564438	0
RPP25	-0.553751	0
TBCB	-0.568871	0
TIGIT	-0.477505	8.12683e-14
MOGS	-0.571119	0
LPCAT1	-0.566064	0
F12	-0.466806	3.3884e-13
PPIB	-0.599841	0
BAIAP2L1	-0.504362	1.77636e-15
ZC3H3	-0.537961	0
HAGHL	-0.512511	4.44089e-16
DKC1	-0.460012	8.17124e-13
PGAM5	-0.438239	1.20726e-11
PLOD3	-0.526861	0
HENMT1	-0.408531	3.5399e-10
NT5DC2	-0.519597	2.22045e-16
MCM5	-0.657503	0
HIST1H2BO	-0.405313	5.0055e-10
ZWILCH	-0.411457	2.57491e-10
MMP9	-0.528633	0
CEMIP	-0.457306	1.15397e-12
NCAPD2	-0.443539	6.3789e-12
PPP1CA	-0.548266	0
FKBPL	-0.530917	0
MCM3	-0.523824	0
RPUSD1	-0.577604	0
DPP3	-0.490534	1.33227e-14
RRP1	-0.608433	0
RANGAP1	-0.597074	0
RTKN	-0.616833	0
DNPH1	-0.522815	0
CILP2	-0.468251	2.8022e-13
SLC35F2	-0.463214	5.40901e-13
LYPD1	-0.404618	5.39166e-10
RUSC1	-0.520953	0
POLA2	-0.509036	8.88178e-16
FAM189B	-0.420799	9.12828e-11
HIST1H3D	-0.42541	5.40707e-11
C2CD4D	-0.546163	0
RRS1	-0.49992	3.55271e-15
LRFN4	-0.544142	0
INAVA	-0.472565	1.58318e-13
CXCL9	-0.400938	7.97004e-10
CHST11	-0.533232	0
SDF2L1	-0.672605	0
RTN4R	-0.607551	0
PYCR3	-0.55888	0
CRELD2	-0.688735	0
TCF3	-0.651013	0
HOXC11	-0.416171	1.53195e-10
P4HB	-0.523951	0
CHTF18	-0.647407	0
MRPL12	-0.524441	0
EFNA4	-0.591862	0
CSK	-0.714005	0
WDR4	-0.553265	0
MFSD12	-0.647695	0
C1orf35	-0.599861	0
MXD3	-0.668173	0
KIF26B	-0.430059	3.16354e-11
BICDL1	-0.526886	0
CKAP4	-0.51327	4.44089e-16
ARL9	-0.446122	4.65517e-12
TSPAN33	-0.529031	0
IRAK1	-0.50846	8.88178e-16
FBXL19	-0.650513	0
OR2B6	-0.40368	5.95944e-10
MTFP1	-0.568273	0
PTP4A3	-0.478515	7.10543e-14
IER5L	-0.583566	0
LAMTOR2	-0.45191	2.27596e-12
HYAL3	-0.49339	8.88178e-15
POLD1	-0.608591	0
SCO2	-0.5798	0
SCX	-0.54114	0
NOP16	-0.496864	5.32907e-15
TMEM158	-0.525678	0
SBK1	-0.498572	4.21885e-15
B4GALT2	-0.484894	2.95319e-14
HIST1H2AD	-0.404117	5.68849e-10
TMEM63B	-0.457859	1.07558e-12
COMP	-0.452926	2.00462e-12
SDS	-0.432553	2.36493e-11
SMG5	-0.432931	2.26219e-11
SH2B2	-0.488679	1.73195e-14
SLC25A22	-0.462459	5.96412e-13
FOXK2	-0.492072	1.06581e-14
PTMA	-0.651201	0
RPP21	-0.624629	0
FCGR1A	-0.496905	5.32907e-15
CCDC137	-0.616559	0
NR2C2AP	-0.521867	0
PODXL2	-0.501576	2.66454e-15
TAGLN2	-0.494943	7.10543e-15
LSM7	-0.668404	0
TMEM79	-0.520982	0
CHST6	-0.400837	8.05549e-10
COPE	-0.572696	0
JMJD4	-0.544651	0
NUAK2	-0.486429	2.39808e-14
MARCKSL1	-0.611604	0
MCOLN2	-0.498894	3.9968e-15
TYMP	-0.591479	0
ISG20L2	-0.456323	1.30718e-12
NAA10	-0.502666	2.22045e-15
LAG3	-0.477245	8.43769e-14
RHNO1	-0.470468	2.09166e-13
PRELID3A	-0.468595	2.67786e-13
ANAPC11	-0.492298	1.04361e-14
RBM38	-0.539201	0
APBA2	-0.542922	0
MAZ	-0.490786	1.28786e-14
KCNG1	-0.434322	1.92104e-11
ARPC1B	-0.560422	0
ARTN	-0.461008	7.1898e-13
ZMYND19	-0.527651	0
ZNF598	-0.543655	0
KIF24	-0.414428	1.8579e-10
TMEM54	-0.543392	0
PLEKHO1	-0.713655	0
SH3BGRL3	-0.54093	0
AIM2	-0.4249	5.73221e-11
MAGED1	-0.461123	7.08544e-13
MIIP	-0.584441	0
TAP1	-0.451779	2.3137e-12
LPAR2	-0.559054	0
FLVCR1	-0.414799	1.78339e-10
C1QTNF6	-0.537074	0
PUS1	-0.596396	0
TMEM8A	-0.478203	7.41629e-14
SLC39A7	-0.542002	0
IFI6	-0.432183	2.46958e-11
TTLL12	-0.437559	1.30926e-11
TRPM2	-0.56027	0
SSR4	-0.56173	0
C19orf48	-0.561571	0
GMDS	-0.465911	3.81029e-13
CENPH	-0.432083	2.49858e-11
ZSWIM4	-0.572927	0
LRFN1	-0.441464	8.19966e-12
MYDGF	-0.599876	0
VARS	-0.550678	0
TRABD	-0.67608	0
COTL1	-0.472953	1.50102e-13
WDR76	-0.421018	8.9063e-11
SMCO4	-0.587495	0
ALDH18A1	-0.410199	2.9537e-10
FAAP24	-0.447909	3.7379e-12
DDX49	-0.488137	1.86517e-14
CHPF	-0.597056	0
CENPX	-0.553092	0
GPC2	-0.467958	2.91323e-13
DUS1L	-0.528956	0
LTA	-0.453687	1.8221e-12
GIPC1	-0.535145	0
SMARCA4	-0.582476	0
KCNK5	-0.505522	1.55431e-15
BOLA1	-0.412074	2.4069e-10
PPP1R35	-0.574583	0
DPH2	-0.450177	2.82396e-12
ARHGAP39	-0.544385	0
WDR34	-0.591476	0
FSCN1	-0.591303	0
COL22A1	-0.492756	9.76996e-15
BCL2A1	-0.412403	2.32158e-10
TTLL4	-0.474385	1.23901e-13
MIF	-0.588151	0
SPP1	-0.432036	2.51237e-11
C4orf48	-0.546754	0
SLC2A1	-0.438263	1.20384e-11
PCSK1N	-0.415955	1.56911e-10
CLCN2	-0.427821	4.09894e-11
LAD1	-0.521658	0
TRIM65	-0.528545	0
ARHGAP22	-0.539524	0
RGS10	-0.551844	0
DNMT1	-0.505075	1.77636e-15
IGSF9	-0.550228	0
PACSIN1	-0.439796	1.00209e-11
SMOX	-0.570091	0
THOC6	-0.658397	0
CARMIL2	-0.518012	2.22045e-16
DNMT3A	-0.508991	8.88178e-16
DNAJC9	-0.4971	5.32907e-15
TIGD5	-0.567553	0
ST3GAL4	-0.405082	5.13103e-10
P4HA3	-0.485868	2.57572e-14
NCS1	-0.569598	0
ADCK5	-0.588342	0
TNFRSF4	-0.538338	0
TMSB15A	-0.409029	3.35375e-10
GABBR2	-0.405419	4.94928e-10
HIST1H4E	-0.411996	2.42754e-10
SSX2IP	-0.408524	3.54241e-10
NUP210	-0.501489	2.66454e-15
PUF60	-0.542535	0
FANCG	-0.512819	4.44089e-16
LTB	-0.59888	0
KNTC1	-0.401131	7.80936e-10
PRSS27	-0.410357	2.90316e-10
TOMM34	-0.524872	0
SLC11A1	-0.407449	3.97884e-10
IKBKE	-0.553211	0
OSCAR	-0.549157	0
UQCC3	-0.495971	6.21725e-15
TSEN54	-0.616089	0
KLRG2	-0.420831	9.09615e-11
NFKBIB	-0.544459	0
DLX5	-0.440797	8.88489e-12
DOK3	-0.595069	0
LRRC61	-0.444075	5.97633e-12
PANX2	-0.57293	0
RELB	-0.574729	0
LRRC45	-0.597494	0
SRC	-0.602318	0
FOXD1	-0.481107	4.9738e-14
TAPBP	-0.560601	0
PTK7	-0.612941	0
EFNA3	-0.4759	1.01252e-13
HIST2H2AC	-0.44732	4.01879e-12
GZMB	-0.441212	8.45235e-12
OCIAD2	-0.569001	0
SCRIB	-0.571351	0
CXCR4	-0.540346	0
TP53BP2	-0.416692	1.44571e-10
TRAF2	-0.623754	0
PKM	-0.554859	0
ESRP1	-0.464928	4.32987e-13
TNFRSF18	-0.604321	0
PDCD1	-0.527846	0
COMTD1	-0.484254	3.24185e-14
FAM83H	-0.535157	0
UNC13D	-0.561166	0
RIBC2	-0.547618	0
CDK5R1	-0.468005	2.89546e-13
MRPS34	-0.478657	6.9722e-14
TMED3	-0.566997	0
SDC1	-0.565114	0
GMIP	-0.624005	0
NAT14	-0.652148	0
CTSV	-0.475724	1.03473e-13
DRAP1	-0.558108	0
PFKP	-0.453453	1.87672e-12
PSME2	-0.504274	1.77636e-15
CTLA4	-0.43608	1.56071e-11
B4GALNT4	-0.609999	0
MUC5B	-0.467466	3.10862e-13
TMEM97	-0.409433	3.20997e-10
PTPN7	-0.531718	0
NOD2	-0.452778	2.04237e-12
SLC38A5	-0.476466	9.37028e-14
RIPPLY3	-0.50636	1.33227e-15
RASD2	-0.452862	2.02083e-12
PRKX	-0.452988	1.98908e-12
KIFC2	-0.51577	4.44089e-16
EFNA1	-0.473505	1.39444e-13
FOXP4	-0.455209	1.5048e-12
SIRPG	-0.491282	1.19904e-14
BARD1	-0.412413	2.31895e-10
C5orf46	-0.44124	8.42393e-12
TMCC2	-0.479966	5.81757e-14
PAXX	-0.626188	0
UNC5B	-0.520797	0
CAPG	-0.559859	0
SFT2D2	-0.432957	2.25542e-11
CAPS	-0.558451	0
MFSD3	-0.439971	9.81304e-12
IL18	-0.470637	2.04503e-13
GALK1	-0.60363	0
GALE	-0.473876	1.32783e-13
UCK2	-0.495731	6.21725e-15
SAMD10	-0.496677	5.55112e-15
ABTB2	-0.415509	1.64872e-10
SNX20	-0.480761	5.21805e-14
ZBP1	-0.451507	2.39364e-12
HYOU1	-0.478735	6.88338e-14
CD72	-0.524105	0
ST14	-0.597143	0
CYBA	-0.623377	0
GJB3	-0.467116	3.25517e-13
RASSF7	-0.579665	0
HIST3H2A	-0.504778	1.77636e-15
MMP14	-0.545632	0
MYO1G	-0.602547	0
EDN2	-0.402673	6.6332e-10
FAM207A	-0.606566	0
ZNF469	-0.508685	8.88178e-16
LLGL2	-0.554339	0
SERPINE2	-0.48429	3.19744e-14
HIST1H2BD	-0.434629	1.85281e-11
DHDH	-0.415172	1.71138e-10
FNDC10	-0.482801	3.95239e-14
EPCAM	-0.443954	6.06515e-12
PPAN	-0.613897	0
CTSD	-0.463308	5.34461e-13
CALHM6	-0.450433	2.73559e-12
CD6	-0.560559	0
BAIAP2L2	-0.416054	1.55193e-10
PILRA	-0.499993	3.55271e-15
LY6E	-0.561804	0
TOP1MT	-0.560663	0
ISG20	-0.631235	0
HLA-A	-0.558159	0
TRAF3IP3	-0.569073	0
SEPTIN3	-0.494012	8.21565e-15
APLP1	-0.472765	1.54099e-13
FGD1	-0.427146	4.43037e-11
NPM3	-0.516265	4.44089e-16
RBBP8NL	-0.551033	0
CORO1A	-0.648602	0
COL9A3	-0.494976	7.10543e-15
ACTR3B	-0.413041	2.16452e-10
NKX2-5	-0.407467	3.97117e-10
PDE7A	-0.402097	7.05097e-10
IRF7	-0.561801	0
SP140	-0.471955	1.7164e-13
ARSI	-0.583399	0
CXCL13	-0.416361	1.49995e-10
TRIM47	-0.612689	0
DDX11	-0.444539	5.64837e-12
TRIM46	-0.481483	4.72955e-14
FAM110A	-0.533175	0
PACSIN3	-0.5053	1.55431e-15
SOX12	-0.461701	6.57696e-13
TAP2	-0.45981	8.3844e-13
TNFRSF12A	-0.591933	0
HLA-DOB	-0.56155	0
SOX4	-0.491661	1.15463e-14
ABHD17C	-0.433184	2.19602e-11
PKP3	-0.555193	0
NIPSNAP1	-0.471997	1.70752e-13
RCN3	-0.519212	2.22045e-16
MMP3	-0.413024	2.16865e-10
CXCR3	-0.520062	2.22045e-16
ADAMTS4	-0.405407	4.95543e-10
EVPL	-0.577989	0
LIG1	-0.56932	0
PLAU	-0.4004	8.43542e-10
CD7	-0.565094	0
MAP4K1	-0.601504	0
ZBTB12	-0.557731	0
SECTM1	-0.468	2.89768e-13
HAPLN3	-0.614675	0
SPIB	-0.402098	7.04991e-10
SNX22	-0.517925	2.22045e-16
COL1A1	-0.429551	3.35545e-11
RASGRP1	-0.423371	6.82281e-11
HK3	-0.425106	5.5987e-11
PIM2	-0.530227	0
PHLDA2	-0.535393	0
CD86	-0.413521	2.05327e-10
MVD	-0.451374	2.43339e-12
SOCS1	-0.43454	1.87232e-11
FBN3	-0.418337	1.20355e-10
TMEM238	-0.549925	0
CEP131	-0.646928	0
SMPDL3B	-0.510208	8.88178e-16
RHPN1	-0.567031	0
CD24	-0.466942	3.33067e-13
PAK4	-0.529236	0
ARHGEF19	-0.631169	0
LARGE2	-0.447026	4.16667e-12
ITGAX	-0.517873	2.22045e-16
FCGR3A	-0.45765	1.10467e-12
VAX2	-0.448081	3.65974e-12
B3GNT7	-0.405271	5.02816e-10
FAM241B	-0.538223	0
CRB3	-0.487367	2.08722e-14
SPTBN2	-0.476963	8.74856e-14
SLC17A9	-0.549354	0
BCL11A	-0.486263	2.44249e-14
MDK	-0.528018	0
SPHK1	-0.671611	0
TNFRSF13C	-0.57669	0
LILRB4	-0.425712	5.22375e-11
HLA-F	-0.525924	0
LCK	-0.532568	0
DEF6	-0.703892	0
PLPP2	-0.520697	0
IL2RG	-0.485994	2.53131e-14
TCL1A	-0.418401	1.19492e-10
VPREB3	-0.4359	1.59441e-11
PAQR6	-0.517961	2.22045e-16
KIAA1549L	-0.438685	1.14464e-11
ZNF296	-0.496804	5.32907e-15
CDCP1	-0.452832	2.0286e-12
SPOCK2	-0.441853	7.82374e-12
CCR7	-0.464756	4.42757e-13
ITGB2	-0.542784	0
PSMB9	-0.430451	3.02236e-11
CD5	-0.490038	1.42109e-14
DIRAS1	-0.466268	3.63709e-13
NECTIN4	-0.489964	1.46549e-14
KRT86	-0.503891	1.77636e-15
MAPK15	-0.431127	2.79377e-11
DAPP1	-0.447452	3.95417e-12
FJX1	-0.546561	0
RASAL1	-0.444634	5.58331e-12
KRT16	-0.406386	4.46126e-10
STAP2	-0.508251	8.88178e-16
TRAF4	-0.560383	0
PLEK2	-0.476894	8.83738e-14
EPHB3	-0.538356	0
RAB25	-0.481872	4.4853e-14
SPINT2	-0.495147	6.88338e-15
IKZF3	-0.424329	6.11828e-11
QPCT	-0.414496	1.84413e-10
KRTCAP3	-0.49472	7.32747e-15
PLEKHG4B	-0.515728	4.44089e-16
HR	-0.403803	5.88174e-10
HLA-DQB1	-0.448682	3.39817e-12
HLA-DQA1	-0.431511	2.67122e-11
AARD	-0.427919	4.05285e-11
CD19	-0.467936	2.92211e-13
CCL5	-0.482056	4.37428e-14
NRTN	-0.466949	3.32623e-13
MELTF	-0.514475	4.44089e-16
PRSS22	-0.449337	3.13394e-12
MAPK8IP2	-0.422294	7.70966e-11
B4GALNT3	-0.461609	6.6569e-13
CLIC3	-0.450769	2.62368e-12
CALML5	-0.415428	1.6634e-10
AP1M2	-0.433913	2.0159e-11
SPINT1	-0.517744	2.22045e-16
CD3D	-0.486332	2.42029e-14
DERL3	-0.54159	0
CD27	-0.51131	6.66134e-16
RAMP1	-0.458856	9.47242e-13
BAMBI	-0.430348	3.05898e-11
CLDN4	-0.499619	3.55271e-15
KDF1	-0.459351	8.89289e-13
CD2	-0.430255	3.09237e-11
RBP1	-0.481805	4.52971e-14
S100A14	-0.456065	1.35048e-12
VANGL2	-0.464265	4.72067e-13
WNT6	-0.443258	6.59983e-12
KCNN4	-0.51825	2.22045e-16
CLDN7	-0.418131	1.23155e-10
CBLC	-0.401157	7.78843e-10
PRSS8	-0.424736	5.84008e-11
KRT81	-0.468217	2.81553e-13
CLDN3	-0.455883	1.38201e-12
RFLNA	-0.435527	1.66631e-11
CHI3L1	-0.458582	9.80993e-13
CDH3	-0.482327	4.21885e-14
KRT7	-0.488837	1.68754e-14
C15orf48	-0.412383	2.32669e-10
KRT8	-0.467948	2.91767e-13
SFN	-0.504817	1.77636e-15
KRT19	-0.480541	5.37348e-14
S100A2	-0.447819	3.77964e-12
KRT23	-0.444527	5.65636e-12
MMP7	-0.405707	4.79839e-10
KRT6B	-0.426548	4.74574e-11
VEGFD	0.423369	6.82452e-11
CD300LG	0.470131	2.18714e-13
CAVIN2	0.44936	3.12461e-12
NOVA1	0.415805	1.59539e-10
CA4	0.482013	4.39648e-14
PDE2A	0.419884	1.01189e-10
BTNL9	0.464261	4.72289e-13
AGTR1	0.507994	8.88178e-16
ABCA8	0.473726	1.35447e-13
ARHGAP20	0.488455	1.79856e-14
ABCA9	0.467107	3.25739e-13
ABLIM3	0.458288	1.0183e-12
FAXDC2	0.40054	8.3122e-10
KL	0.443777	6.1966e-12
ADH1C	0.499731	3.55271e-15
NKAPL	0.508173	8.88178e-16
ATP1A2	0.566936	0
FGF10	0.443694	6.25944e-12
NOSTRIN	0.411061	2.68861e-10
ITIH5	0.412867	2.20638e-10
PDGFD	0.400322	8.50544e-10
LDB2	0.40481	5.28254e-10
ANGPTL1	0.454666	1.61138e-12
ZBTB16	0.509054	8.88178e-16
SYNPO2	0.413358	2.09039e-10
RBMS3	0.440433	9.28257e-12
TMEM132C	0.473103	1.47438e-13
PRKN	0.505208	1.55431e-15
CD36	0.521621	0
FAM162B	0.424789	5.80482e-11
FXYD1	0.469586	2.34923e-13
KLHDC1	0.433808	2.04095e-11
ABCA6	0.464717	4.44977e-13
C1QTNF9	0.433244	2.18083e-11
CAV1	0.45	2.88658e-12
CRY2	0.470974	1.95621e-13
ADRB2	0.436561	1.47415e-11
MAOA	0.544113	0
ACACB	0.514501	4.44089e-16
GHR	0.559099	0
HSPB6	0.477972	7.63833e-14
ASPA	0.536601	0
PDK4	0.482122	4.32987e-14
FAM47E	0.450467	2.72404e-12
LEPR	0.415344	1.67911e-10
TGFBR3	0.460935	7.25864e-13
ADH1B	0.46576	3.88578e-13
ADAMTS5	0.418652	1.16183e-10
THRB	0.489186	1.62093e-14
AQP7	0.51174	4.44089e-16
GALNT15	0.455109	1.52389e-12
CEP126	0.442975	6.83031e-12
TNS1	0.464924	4.33431e-13
EBF1	0.458602	9.78551e-13
LIFR	0.444875	5.42189e-12
CES1	0.409535	3.17452e-10
CYBRD1	0.428606	3.74358e-11
CCDC158	0.401657	7.38702e-10
NPR1	0.416508	1.47564e-10
FAM13A	0.536836	0
PTGER3	0.490952	1.26565e-14
TXNIP	0.45261	2.08544e-12
FHL5	0.445546	4.99489e-12
MYCT1	0.428274	3.89009e-11
GPD1	0.475115	1.12355e-13
TIMP4	0.494888	7.10543e-15
PLIN1	0.44897	3.27915e-12
AOC3	0.464022	4.87166e-13
FHL1	0.440972	8.69993e-12
CIDEC	0.435968	1.58149e-11
MAST4	0.425567	5.311e-11
TRARG1	0.42838	3.8427e-11
AHNAK	0.426339	4.86109e-11
MTURN	0.496079	6.21725e-15
GPR146	0.431893	2.55471e-11
DIXDC1	0.434282	1.93014e-11
PLIN4	0.412315	2.34417e-10
TMTC1	0.466076	3.72813e-13
SELENOP	0.463576	5.16254e-13
CHRDL1	0.410144	2.97123e-10
SH3D19	0.492407	1.02141e-14
EBF3	0.433336	2.15721e-11
FABP4	0.417456	1.32794e-10
SLC2A4	0.614011	0
PPARG	0.505463	1.55431e-15
CDO1	0.462642	5.82645e-13
MOCS1	0.459186	9.08162e-13
IL6ST	0.401213	7.74206e-10
FZD4	0.506743	1.33227e-15
PLSCR4	0.412034	2.41728e-10
LEP	0.417051	1.38915e-10
CEP68	0.422	7.97042e-11
TMEM252	0.406938	4.20423e-10
FBXL5	0.549142	0
SSTR1	0.436778	1.43658e-11
KCNIP2	0.458391	1.0052e-12
PREX2	0.492404	1.02141e-14
HOGA1	0.537898	0
FAM241A	0.490591	1.33227e-14
LAMA2	0.41862	1.16603e-10
GPAM	0.553981	0
ACOX2	0.417822	1.27476e-10
PTPRB	0.41594	1.57167e-10
TMEM246	0.40451	5.45473e-10
GPD1L	0.582097	0
LIPE	0.430389	3.04436e-11
CLSTN2	0.438131	1.22293e-11
RNASE4	0.431704	2.61182e-11
COL6A6	0.401837	7.24818e-10
CLIC5	0.480275	5.59552e-14
ACSM5	0.525927	0
F8	0.502927	2.22045e-15
ALDH1A1	0.413869	1.97599e-10
EDNRB	0.418116	1.23364e-10
CPA1	0.485587	2.68674e-14
HCAR1	0.437557	1.30949e-11
LIN7A	0.417716	1.28994e-10
PALMD	0.519204	2.22045e-16
GLYAT	0.484183	3.26406e-14
AKAP12	0.435232	1.72546e-11
SH3BGRL2	0.405759	4.77176e-10
KLF9	0.442996	6.81277e-12
NR3C1	0.50327	2.22045e-15
MGLL	0.461754	6.53255e-13
HSD17B13	0.527942	0
SCN4A	0.55084	0
ADIPOQ	0.464738	4.43867e-13
PFKFB1	0.595394	0
MICU3	0.453581	1.84652e-12
ECM2	0.481274	4.88498e-14
PLAAT5	0.466019	3.75699e-13
FOXO1	0.440556	9.14646e-12
HNMT	0.460687	7.49401e-13
CPED1	0.538455	0
RBP4	0.451194	2.48868e-12
RNF180	0.432787	2.30096e-11
MYOM1	0.54992	0
PLPP3	0.430174	3.12133e-11
RDH5	0.456993	1.20082e-12
SORBS1	0.510071	8.88178e-16
KLF15	0.506349	1.33227e-15
EBF2	0.485052	2.88658e-14
STEAP4	0.403157	6.30052e-10
EPAS1	0.458014	1.05471e-12
THRSP	0.515212	4.44089e-16
MYZAP	0.453408	1.88738e-12
LRIG1	0.419546	1.051e-10
LRRC2	0.43766	1.29354e-11
ITGA7	0.417229	1.36185e-10
FBXL17	0.510913	6.66134e-16
MTMR10	0.479771	5.9952e-14
ADHFE1	0.552259	0
FYCO1	0.493141	9.32587e-15
LRRN3	0.40194	7.16919e-10
NATD1	0.418296	1.20905e-10
NDNF	0.434857	1.80365e-11
STXBP1	0.405686	4.80922e-10
CASQ2	0.501118	2.88658e-15
MLXIPL	0.530702	0
NIPSNAP3B	0.570094	0
ADGRF5	0.469726	2.30926e-13
CIDEA	0.454208	1.70663e-12
CAV2	0.454944	1.55564e-12
ACVR1C	0.564966	0
FAM149A	0.439099	1.0894e-11
RGS5	0.444232	5.86287e-12
HSPB7	0.448716	3.38396e-12
PDK2	0.508281	8.88178e-16
TEK	0.41466	1.8109e-10
IGF1	0.45919	9.07718e-13
GLDN	0.535877	0
DMD	0.497547	4.88498e-15
LIMA1	0.412886	2.20171e-10
SYNE3	0.432598	2.35225e-11
TK2	0.441971	7.7125e-12
EIF4E3	0.48067	5.28466e-14
LGALS12	0.492462	1.02141e-14
PDE8B	0.453451	1.87694e-12
ABCC6	0.515591	4.44089e-16
HCAR3	0.543539	0
SIK2	0.56969	0
ACADSB	0.409404	3.22001e-10
FAM214A	0.438697	1.14297e-11
SASH1	0.448956	3.28493e-12
AASS	0.443625	6.31273e-12
SLC19A3	0.48519	2.84217e-14
ALDH1L1	0.551359	0
ACER2	0.522336	0
SGCG	0.549937	0
C1QTNF7	0.491631	1.15463e-14
LPL	0.48322	3.73035e-14
ADGRL4	0.409322	3.24892e-10
LDHD	0.540887	0
C14orf180	0.445163	5.23404e-12
KLB	0.5154	4.44089e-16
HEPACAM	0.543416	0
PDE11A	0.535107	0
TACC1	0.469482	2.38476e-13
FGF2	0.411661	2.51797e-10
HRC	0.417695	1.29299e-10
POLI	0.475751	1.03251e-13
ETFDH	0.625736	0
CYP4B1	0.438898	1.11593e-11
UTRN	0.424717	5.8533e-11
RGS22	0.543657	0
MRAP	0.452223	2.18892e-12
MYOC	0.464929	4.32987e-13
PCK1	0.506589	1.33227e-15
SLC35G2	0.476744	9.01501e-14
CALCOCO2	0.465981	3.77476e-13
PTPN21	0.424596	5.93423e-11
SGK2	0.466545	3.50608e-13
DEFB132	0.514165	4.44089e-16
AR	0.440152	9.60121e-12
HIF3A	0.423194	6.96148e-11
CCDC36	0.517642	2.22045e-16
TLR3	0.425875	5.12699e-11
USP53	0.409531	3.17619e-10
CKMT2	0.505187	1.55431e-15
ELMOD3	0.41108	2.68324e-10
CRHBP	0.573609	0
METTL7A	0.444266	5.83933e-12
CD302	0.505268	1.55431e-15
PNPLA2	0.469866	2.26485e-13
PLIN5	0.525713	0
DSEL	0.413793	1.99265e-10
TBX15	0.479315	6.35048e-14
PEX11A	0.506309	1.33227e-15
PCCA	0.542444	0
CACNA2D1	0.457722	1.09468e-12
SYNJ2BP	0.420392	9.55678e-11
ALDH6A1	0.69741	0
GABARAPL1	0.467098	3.26184e-13
ARHGEF6	0.428461	3.80691e-11
BTD	0.469655	2.32925e-13
CCDC85A	0.403308	6.20028e-10
SERINC1	0.48455	3.10862e-14
HCAR2	0.471276	1.8785e-13
CAT	0.543171	0
SAMD8	0.518915	2.22045e-16
CFL2	0.536602	0
NAALAD2	0.547455	0
AKR1C1	0.441199	8.46523e-12
PPP1R1A	0.492612	9.99201e-15
TMEM135	0.629154	0
2022-03-02	0.431652	2.62765e-11
CLMP	0.484007	3.33067e-14
CDC14B	0.448884	3.31424e-12
ANO6	0.580268	0
TRIM23	0.42229	7.7133e-11
MAP3K20	0.483432	3.61933e-14
TMEM37	0.404512	5.45363e-10
CCNG1	0.539211	0
TMEM47	0.408996	3.36572e-10
GRK3	0.468649	2.66009e-13
PCYOX1	0.60405	0
ACSS2	0.617493	0
PLAAT3	0.420917	9.00773e-11
TLN2	0.455821	1.39266e-12
HSDL2	0.6874	0
SETD7	0.515634	4.44089e-16
ZNF25	0.449756	2.97518e-12
ANTXR2	0.431771	2.59135e-11
TMEM245	0.50377	1.9984e-15
LVRN	0.553545	0
AFF1	0.448712	3.38529e-12
KAT2B	0.49165	1.15463e-14
GPR34	0.439315	1.0616e-11
ACSS3	0.579782	0
APBB2	0.439641	1.02096e-11
ABLIM1	0.428796	3.66223e-11
PDZD2	0.531219	0
SLC10A6	0.423317	6.86478e-11
SLC16A7	0.560484	0
DIPK1A	0.431636	2.63252e-11
DNAJB4	0.453824	1.79123e-12
SLC22A3	0.418836	1.13816e-10
RETSAT	0.529897	0
FOXN3	0.499375	3.77476e-15
SLC25A16	0.536099	0
RNF125	0.535553	0
ZNF106	0.552124	0
FERMT2	0.439374	1.05407e-11
HADH	0.656838	0
STS	0.490185	1.42109e-14
SLC25A20	0.435749	1.62317e-11
2022-03-01	0.542297	0
KLHL31	0.631054	0
GYG2	0.457393	1.14131e-12
SPTBN1	0.40189	7.20736e-10
DMGDH	0.524848	0
COBLL1	0.509829	8.88178e-16
ALDH3A2	0.43827	1.20286e-11
ANKRD53	0.413253	2.11475e-10
ADRA1A	0.499686	3.55271e-15
ALDH2	0.451733	2.32703e-12
PHLDB2	0.427027	4.4915e-11
FITM2	0.556775	0
ADH1A	0.556272	0
PLXNA4	0.47024	2.15605e-13
HSPA12A	0.421721	8.22626e-11
RXRG	0.554799	0
PARD3B	0.405683	4.81085e-10
PFKFB3	0.457554	1.11822e-12
ANGPTL8	0.417982	1.25221e-10
ITGA1	0.409947	3.03551e-10
ITSN1	0.469417	2.40252e-13
ABCC9	0.53612	0
AKR1C2	0.497931	4.66294e-15
ELOVL5	0.484165	3.26406e-14
DMXL1	0.413233	2.1193e-10
RASGRF2	0.498237	4.44089e-15
BNIP3L	0.559754	0
CHURC1	0.436535	1.47875e-11
SUCLA2	0.628749	0
SOX5	0.486314	2.42029e-14
AVPR1A	0.513773	4.44089e-16
STBD1	0.487801	1.95399e-14
DDR2	0.44298	6.82565e-12
POLK	0.405776	4.76319e-10
AKR1C3	0.486266	2.44249e-14
PYGM	0.549953	0
RETREG1	0.41175	2.49355e-10
ABHD6	0.458522	9.88543e-13
NFIA	0.402804	6.54147e-10
GNAI1	0.548398	0
CITED2	0.418073	1.23959e-10
RFTN2	0.426583	4.72702e-11
KDR	0.406179	4.56143e-10
GLRB	0.402482	6.76874e-10
ZEB1	0.425414	5.40452e-11
ACADL	0.604687	0
PTEN	0.415214	1.70344e-10
ESYT1	0.409266	3.26869e-10
WASF3	0.487471	2.06501e-14
YPEL2	0.438318	1.19602e-11
ABCD2	0.538946	0
BHMT2	0.404644	5.37713e-10
PARVA	0.416577	1.46443e-10
GNG12	0.428139	3.95137e-11
PRRT4	0.465992	3.77032e-13
MAPK10	0.49701	5.32907e-15
CMBL	0.401326	7.65057e-10
CRYBG3	0.516424	4.44089e-16
ACO1	0.542611	0
SLC7A10	0.463375	5.29798e-13
LNPEP	0.415061	1.73241e-10
SNTB2	0.428311	3.87348e-11
ACSL1	0.599611	0
CPEB2	0.414496	1.84396e-10
FRMD1	0.487325	2.08722e-14
KATNAL1	0.441012	8.65841e-12
SIAE	0.44817	3.61977e-12
RNF157	0.474709	1.18794e-13
SLC25A18	0.554107	0
CA3	0.488757	1.73195e-14
APOB	0.573542	0
SLC14A2	0.491006	1.24345e-14
AOC2	0.400932	7.97542e-10
ANKRD40	0.432849	2.28413e-11
SLC4A4	0.566117	0
PRKAR2B	0.548685	0
ASAH1	0.495036	7.10543e-15
C2CD2	0.452109	2.22022e-12
MMD	0.471559	1.80966e-13
FILIP1	0.401038	7.88707e-10
CADM2	0.557908	0
MECOM	0.420674	9.25875e-11
MYCBP2	0.433036	2.23463e-11
CYB5A	0.558352	0
MPDZ	0.417306	1.35028e-10
DMRT2	0.431822	2.57594e-11
TEAD1	0.494411	7.54952e-15
LIMCH1	0.480754	5.24025e-14
CPEB4	0.42132	8.60747e-11
PLN	0.419877	1.0127e-10
SBF2	0.441143	8.52229e-12
ABHD15	0.414539	1.83535e-10
FFAR4	0.462728	5.75984e-13
FAH	0.506034	1.33227e-15
COL25A1	0.40354	6.04908e-10
SPX	0.548696	0
FNIP2	0.47948	6.21725e-14
ASPH	0.530623	0
ADRB1	0.482843	3.90799e-14
TMEM170B	0.557098	0
ECI2	0.438944	1.10978e-11
GPLD1	0.431896	2.55374e-11
PDE3B	0.497781	4.88498e-15
DOCK11	0.434308	1.92411e-11
KCNAB1	0.400656	8.21128e-10
ABCA1	0.466721	3.42615e-13
DENND4C	0.40119	7.76077e-10
NMT2	0.404098	5.69984e-10
ANGPTL5	0.41632	1.50676e-10
EEA1	0.425858	5.13669e-11
TM7SF2	0.428382	3.84208e-11
SC5D	0.453697	1.8201e-12
PECR	0.469891	2.25819e-13
GBE1	0.558631	0
C6	0.405517	4.89739e-10
TRDN	0.415237	1.69903e-10
STOX1	0.429584	3.34293e-11
RHOBTB3	0.470162	2.17826e-13
LDB3	0.418603	1.16819e-10
ALPK3	0.595362	0
GYS2	0.581156	0
ECHDC3	0.419887	1.01151e-10
CALCRL	0.472224	1.65645e-13
FAM89A	0.478327	7.28306e-14
GABRE	0.424079	6.29503e-11
PRXL2A	0.472811	1.53211e-13
EPB41L4B	0.484566	3.08642e-14
DGAT2	0.401542	7.47761e-10
SCD	0.461761	6.52811e-13
