# Supplementary material for: Identification of molecular subtypes and a six-gene risk model related to cuproptosis for triple negative breast cancer
Source: Front Genet. 2022 Oct 28;13:1022236. doi: 10.3389/fgene.2022.1022236 (PMC9649643; doi:10.3389/fgene.2022.1022236)
Supplement: Supplementary file 9 [file Table5.XLSX]

## Sheet: Table S3
Table S3. A list of 39 prognostic DEGs
ADM2
TLCD1
CDK2AP1
HIST1H2AM
SBK1
PODXL2
PRELID3A
ARPC1B
C1QTNF6
CHPF
P4HA3
FOXD1
SDC1
RASD2
FOXP4
IL18
GJB3
EPCAM
SEPTIN3
RASGRP1
SMPDL3B
KRT16
PLEK2
NRTN
S100A2
CA4
PDE2A
AGTR1
MAOA
HSPB6
TIMP4
HSPB7
LIMA1
HCAR2
GPR34
2022-03-01
PYGM
FRMD1
CA3
